# Supplementary material for: Drug Induced Liver Injury: Perspective of the Adverse Drug Reaction Reports to the Portuguese Pharmacovigilance System from 2010 to 2019
Source: MDPI journal article supplement (doi:10.3390/healthcare9121630), 2021-11-25
Supplement: s1 [file s1]

**Supplementary Table S1**

| Drug                                                      | n | off label use                                                                     |
|-----------------------------------------------------------|---|-----------------------------------------------------------------------------------|
| Amoxicillin plus clavulanic acid.                         | 4 | Abdominal wall hematoma.                                                          |
| Eculizumab                                                | 1 | Glomerulonephritis crescentic.                                                    |
| Idealisib                                                 | 1 | Chronic lymphocytic leukaemia as first-line therapy                               |
| imatinib                                                  | 1 | Severe myelofibrosis.                                                             |
| immunoglobulin G                                          | 1 | Atopic dermatitis.                                                                |
| Amiodarone and esmolol                                    | 2 | Bradycardia                                                                       |
| Azithromycin                                              | 1 | Mykobacterium lentiflavum.                                                        |
| Baclofen                                                  | 3 | Thalamic pain.                                                                    |
| Budesonide (gastro-resistant capsule) and esomeprazole.   | 1 | Respiratory tract infection.                                                      |
| Buprenorphine.                                            | 3 | HIV disease, HCV coinfection and chronic hepatitis C.                             |
| Bupropion                                                 | 1 | Depressive symptoms and anxiety                                                   |
| capecitabine e trastuzumabe                               | 3 | Mixed phenotype acute leukaemia, Invasive ductal carcinoma; as first-line therapy |
| Ciprofloxacin                                             | 4 | cholangitis; Secondary prophylaxis for spontaneous bacterial peritonitis.         |
| cisplatin                                                 | 3 | Pericardial effusion.                                                             |
| Clonazepam                                                | 1 | Anxiety, dose                                                                     |
| darunavir                                                 | 3 | HIV2 infection                                                                    |
| Dienogest/etinilestradiol                                 | 1 | Acne                                                                              |
| eculizumab                                                | 1 | Glomerulonephritis crescentic.                                                    |
| Esomeprazole plus Budesonide                              | 1 | Respiratory tract infection.                                                      |
| Estiripentol                                              | 2 | Myoclonic epilepsy, dose and frequency increased                                  |
| Goserreline                                               | 2 | Uterine myoma                                                                     |
| Ibuprofen                                                 | 1 | Non-productive cough.                                                             |
| Interferon beta-1a                                        | 1 | Multiple sclerosis, paediatric use                                                |
| Ketoconazole                                              | 1 | Ectopic Adrenocorticotrophic (ACTH) syndrome caused by a nasal paraganglioma.     |
| mercaptopurine                                            | 1 | Crohn's disease                                                                   |
| Methotrexate                                              | 2 | Eosinophilic Fasciitis, Systemic Lupus Erythematosus                              |
| Metronidazole.                                            | 2 | Diarrhoea and fever in paediatric population                                      |
| midostaurin                                               | 1 | Population (paediatric)                                                           |
| Moxifloxacin plus isoniazid, pyrazinamide and ethambutol. | 1 | Pulmonary and Pleural Tuberculosis, resistant.                                    |
| Nivolumab                                                 | 2 | Hepatocellular carcinoma                                                          |
| Paracetamol                                               | 2 | Nasopharyngitis or tonsillitis.                                                   |
| Peginterferon beta-1a                                     | 3 | Chronic Hepatitis C.                                                              |
| Piperacillin and tazobactam                               | 1 | Catheter-related bloodstream infection (CRBSI) caused by MRSA.                    |
| Piperacillin and Tazobactam.                              | 1 | central line infection in children                                                |
| Rituximab and HAART.                                      | 1 | Castleman disease and HIV infection.                                              |
| Sirolimus                                                 | 2 | Prophylaxis against liver transplant rejection.                                   |
| Sunitinib                                                 | 3 | Bone cancer metastatic, Metastatic thyroid cancer.                                |
| Telaprevir                                                | 1 | HCV/HIV co-infection.                                                             |

|                          |   |                                                                                 |
|--------------------------|---|---------------------------------------------------------------------------------|
| terbinafine              | 5 | Onychomycosis, dose increased                                                   |
| ulipristal acetate 5 mg) | 2 | Uterus with a 12 cm volume, Multiple massive uterine fibroids without symptoms. |
| Ustekinumab.             | 4 | psoriasis                                                                       |
| Valproic acid.           | 1 | Personality disorder.                                                           |

**Supplementary Table S2**

| <b>Causality rates in cases of serious hepatic adverse drug reactions<br/>in relation to the number of suspected drugs</b> |              |                                              |                               |
|----------------------------------------------------------------------------------------------------------------------------|--------------|----------------------------------------------|-------------------------------|
| <b>Causality</b>                                                                                                           | <b>n (%)</b> | <b>Average number of<br/>suspected drugs</b> | <b>Standard<br/>Deviation</b> |
| Unassigned                                                                                                                 | 1303 (71.3)  | 2.45                                         | 2.451                         |
| Likely                                                                                                                     | 273 (14.9)   | 1.31                                         | 0.764                         |
| Possible                                                                                                                   | 202 (11.0)   | 1.56                                         | 0.948                         |
| Definitive                                                                                                                 | 24 (1.3)     | 1.08                                         | 0.282                         |
| Unlikely                                                                                                                   | 11 (0.6)     | 1.54                                         | 0.687                         |
| Conditional                                                                                                                | 7 (0.4)      | 1.00                                         | 0.000                         |
| Not Related                                                                                                                | 5 (0.3)      | 1.20                                         | 0.447                         |
| Not Classifiable                                                                                                           | 3 (0.2)      | 1.00                                         | 0.000                         |

Average number and Standard deviation were used.

**Supplementary Table S3****Cases with positive viral markers included in the sample of patients with reported adverse drug reactions.**

| <b>Viral marker-positive</b> | <b>n</b>  | <b>IH</b> | <b>Reactivation Relapse</b> | <b>Coinfection</b> | <b>FH</b> | <b>Cholestasis</b> | <b>Ascites</b> | <b>HM</b> | <b>FC</b> | <b>Other systems</b> |
|------------------------------|-----------|-----------|-----------------------------|--------------------|-----------|--------------------|----------------|-----------|-----------|----------------------|
| CMG                          | 6         | ND        | ND                          | 1*                 |           | 1                  |                | 5         |           | 1                    |
| EBV                          | 2         | ND        | ND                          |                    |           |                    | 1              | 1         |           | 1                    |
| HBV                          | 5         | 1         | 4                           |                    | 3         | 1                  |                | 1         |           |                      |
| HCV                          | 10        | 1         | 5                           | 1**                |           |                    | 1              |           | 3         |                      |
| HEV                          | 1         | ND        | ND                          |                    |           |                    |                |           |           |                      |
| Herpes simplex               | 1         | ND        | ND                          |                    |           |                    |                |           |           |                      |
| Herpes zoster                | 3         | ND        | 1                           |                    | 1         |                    | 2              |           |           | 1                    |
| HIV                          | 3         | 3         | NR                          |                    |           |                    |                |           | 1         |                      |
| <b>Total</b>                 | <b>31</b> | <b>4</b>  | <b>10</b>                   | <b>2</b>           |           |                    | <b>4</b>       | <b>7</b>  | <b>4</b>  | <b>3</b>             |

Abbreviations- ND - not described; NR - not relevant; CMG – Cytomegalovirus; EBV - Epstein-Barr virus; HBV – Hepatitis B virus; HCV - Hepatitis C virus; HEV - Hepatitis E virus; HIV – human deficiency virus; n – number of cases; IH - indication for hospitalization; FH - fulminant hepatitis; HM – hepatomegaly; FC – Fibrosis Cirrhosis. HIV cases were included due to the use of antiretroviral drugs which present potential hepatotoxicity. Indication of hospitalization: report of hospitalization due to the viral infection. Reactivation relapse: report of clinical or laboratory reactivation of viral infection, including the native liver or transplanted liver. Coinfection: reported in 2 cases: \*- Cytomegalovirus plus Epstein-Barr; \*\*- HIV plus hepatitis C (patient with cirrhosis). Fulminant hepatitis: report of associated coagulation disorder or encephalopathy. Cholestasis: report of jaundice plus pruritus, choloria or acholic stools. Other systems: report of pleural or pericardial effusion, or pleuritis.

## Supplementary Table S4

**Table 8 - Distribution of reported cases of adverse drug reactions according to the Anatomical Therapeutic Chemical Code (ATCC)**

| <b>A Alimentary tract and metabolism n=91 (2.76%)</b>                                     | <b>n (%)</b> |
|-------------------------------------------------------------------------------------------|--------------|
| A01 Stomatological preparations                                                           | 4 (0.12)     |
| A02 Antacids, medicines to treat peptic ulcer and flatulence                              | 16 (0.49)    |
| A03 Drugs for functional gastrointestinal disorders                                       | 1 (0.03)     |
| A05 Biliary and hepatic therapy                                                           | 4 (0.12)     |
| A06 Laxatives                                                                             | 1 (0.03)     |
| A07 Antidiarrheal, intestinal anti-inflammatory and anti-infectious agents                | 13 (0.39)    |
| A08 Anti-obesity preparations, excluding diet products                                    | 1 (0.03)     |
| A10 Medicines used in diabetes                                                            | 46 (1.40)    |
| A11 Vitamins                                                                              | 3 (0.09)     |
| A16 Other products for digestive tract and metabolism                                     | 2 (0.06)     |
| <b>B Blood and blood forming organs n=52 (1.58%)</b>                                      |              |
| B01 Antithrombotic drugs                                                                  | 41 (1.25)    |
| B02 Anti-haemorrhagic                                                                     | 5 (0.15)     |
| B03 Antianemic drugs                                                                      | 3 (0.09)     |
| B05 Blood substitutes and perfusion solutions                                             | 1 (0.03)     |
| B06 Other haematological products                                                         | 2 (0.06)     |
| <b>C Cardiovascular system n=198 (6.01%)</b>                                              |              |
| C01 Cardiac therapy                                                                       | 31 (0.94)    |
| C02 Antihypertensives                                                                     | 31 (0.94)    |
| C03 Diuretics                                                                             | 24 (0.73)    |
| C04 Peripheral vasodilators                                                               | 3 (0.09)     |
| C05 Vasoprotectors                                                                        | 2 (0.06)     |
| C07 Beta blockers                                                                         | 8 (0.24)     |
| C08 Calcium channel blockers                                                              | 12 (0.36)    |
| C09 Agents that act on the renin-angiotensin system                                       | 26 (0.79)    |
| C10 Hypolipidemic                                                                         | 61 (1.85)    |
| <b>D Dermatologicals n=25 (0.76%)</b>                                                     |              |
| D01 Antifungals for dermatological use                                                    | 12 (0.36)    |
| D05 Antipsoriatics                                                                        | 1 (0.03)     |
| D06 Antibiotics and chemotherapy for dermatological use                                   | 7 (0.21)     |
| D07 Corticosteroids, dermatological preparations                                          | 2 (0.06)     |
| D10 Anti-acne preparations                                                                | 1 (0.03)     |
| D11 Other dermatological preparations                                                     | 2 (0.06)     |
| <b>G Genito urinary system and sex hormones n=50 (1.52%)</b>                              |              |
| G01 Gynaecological anti-infectives and antiseptics                                        | 3 (0.09)     |
| G03 Sex hormones and modulators of the genital system                                     | 36 (1.09)    |
| G04 Urological medications                                                                | 11 (0.33)    |
| <b>H Systemic hormonal preparations, excluding sex hormones and insulins n=70 (2.13%)</b> |              |
| H01 Pituitary, hypothalamic and analogous hormones                                        | 1 (0.03)     |
| H02 Corticosteroids for systemic use                                                      | 61 (1.85)    |
| H03 Thyroid therapy                                                                       | 8 (0.24)     |
| <b>J Antiinfective for systemic use n=1192 (36.20%)</b>                                   |              |
| J01 Antibacterials for systemic use                                                       | 282 (8.56)   |
| J02 Antimycotic for systemic use                                                          | 41 (1.25)    |
| J04 Antimycobacterials                                                                    | 131 (3.98)   |
| J05 Antivirals for systemic use                                                           | 713 (21.65)  |
| J06 Immunosorbents and immunoglobulins                                                    | 5 (0.15)     |
| J07 Vaccines                                                                              | 20 (0.61)    |
| <b>L Antineoplastic and immunomodulating agents n=892 (27.09%)</b>                        |              |
| L01 Antineoplastic agents                                                                 | 430 (13.06)  |
| L02 Endocrine therapy                                                                     | 37 (1.12)    |
| L03 Immunostimulants                                                                      | 81 (2.46)    |
| L04 Immunosuppressive agents                                                              | 344 (10.45)  |
| <b>M Musculo-skeletal system n=86 (2.61%)</b>                                             |              |
| M01 Anti-inflammatory and antirheumatic                                                   | 50 (1.52)    |
| M02 Topical products for joint and muscle pain                                            | 3 (0.09)     |
| M03 Muscle relaxants                                                                      | 10 (0.30)    |
| M04 Anti-gout preparations                                                                | 14 (0.43)    |
| M05 Medicines for treating bone diseases                                                  | 9 (0.27)     |
| <b>N Nervous system n=567 (17.22%)</b>                                                    |              |
| N01 Anaesthetics                                                                          | 4 (0.12)     |

|                                                                           |            |
|---------------------------------------------------------------------------|------------|
| N02 Pain relievers                                                        | 101 (3.07) |
| N03 Antiepileptics                                                        | 77 (2.34)  |
| N04 Antiparkinsonians                                                     | 19 (0.58)  |
| N05 Psycholeptics                                                         | 186 (5.65) |
| N06 Psychoanalytic                                                        | 110 (3.34) |
| N07 Other nervous system medications                                      | 70 (2.13)  |
| <b>P Antiparasitic products, insecticides and repellents n=11 (0.33%)</b> |            |
| P01 Anti-protozoa                                                         | 6 (0.18)   |
| P02 Anthelmintics                                                         | 5 (0.15)   |
| <b>R Respiratory system n=42 (1.28%)</b>                                  |            |
| R02 Prepared for pharyngeal use                                           | 12 (0.36)  |
| R03 Antiasthmatics                                                        | 17 (0.52)  |
| R05 Prepared against coughs and colds                                     | 2 (0.06)   |
| R06 Antihistamines for systemic use                                       | 11 (0.33)  |
| <b>V Various n=17 (0.52%)</b>                                             |            |
| V3 Other therapeutic products                                             | 10 (0.30)  |
| V8 Contrast media                                                         | 4 (0.12)   |
| V9 Diagnostic radiopharmaceuticals                                        | 3 (0.09)   |
| Abbreviations: n – number of cases.                                       |            |
